# Supplementary material
Source: HighWire-hosted journal article supplement (https://bmjopen.bmj.com/content/15/4/e093501)
Supplement: inline-supplementary-material-1 [file inline-supplementary-material-1.pdf]

PATIENT EXIT SURVEY

FACILITY DETAILS

|  |                    |                                                                                                                                                                                                                                                              |  |
|--|--------------------|--------------------------------------------------------------------------------------------------------------------------------------------------------------------------------------------------------------------------------------------------------------|--|
|  | Name of facility   | [Drop down]                                                                                                                                                                                                                                                  |  |
|  | District           | [Drop down]                                                                                                                                                                                                                                                  |  |
|  | Chiefdom           | [Drop down]                                                                                                                                                                                                                                                  |  |
|  | Type of facility   | National tertiary referral hospital .....<br>Provincial secondary hospital.....<br>District secondary hospital.....<br>Community health centre (chc) .....<br>Community health post (chp) .....<br>Maternal child health post (mchp).....<br>Other (specify) |  |
|  | Managing Authority | Government/public.....<br>Ngo/not-for-profit.....<br>Private-for-profit .....<br>Mission/faith-based .....<br>Other (specify)                                                                                                                                |  |
|  | Urban/rural        | Urban .....<br>Rural .....                                                                                                                                                                                                                                   |  |
|  | Geocode            |                                                                                                                                                                                                                                                              |  |

HEALTH INFORMATION CONSENT FORMS

X: INTERVIEW DETAILS

|  |                      |                                                                                |  |
|--|----------------------|--------------------------------------------------------------------------------|--|
|  | Interviewer name     | [Drop down list of interviewers]                                               |  |
|  | Date of Interview    | [Date ]                                                                        |  |
|  | Time of Interview    | [Time]                                                                         |  |
|  | Health facility unit | OPD<br><br>MCH (family planning, ANC, and postnatal care)<br><br>HIV/TB clinic |  |

PATIENT (IF CHILD IS THE PATIENT, RESPONDENT) DEMONGRAPHIC INFORMATION

|  |                                                                                                                             |                                                                                                                                               |  |
|--|-----------------------------------------------------------------------------------------------------------------------------|-----------------------------------------------------------------------------------------------------------------------------------------------|--|
|  | What is your age?                                                                                                           |                                                                                                                                               |  |
|  | What is your gender?                                                                                                        |                                                                                                                                               |  |
|  | What is your current marital status?                                                                                        | 1 Married or living together<br>2 Divorced/separated<br>3 Widowed<br>4 Never married and never lived together                                 |  |
|  | Have you ever attended school?                                                                                              | 0 No<br>1 Yes<br>98 Don't know                                                                                                                |  |
|  | What is the highest level of school you attended?                                                                           | Sierra Leone<br>1 Pre-primary<br>2 Primary<br>3 Secondary<br>3 Tertiary/university<br>4 Vocational/trade school<br>5 Madrasa<br>98 Don't know |  |
|  | Are you currently working?                                                                                                  | 0 No<br>1 Yes<br>98 Don't know                                                                                                                |  |
|  | Has you always lived in this chiefdom?                                                                                      | 0 No<br>1 Yes<br>98 Don't know                                                                                                                |  |
|  | Are you visiting the health facility today because of a problem you are having or because of a problem the child is having? | <div><div></div> Self</div> <div><div></div> Child</div> <div><div></div> Both</div>                                                          |  |
|  | If child, how is old is the child?                                                                                          |                                                                                                                                               |  |

HOUSEHOLDS SOCIAL ECONOMIC STATUS

|  |                                       |               |  |
|--|---------------------------------------|---------------|--|
|  | Does your household have electricity? | 0 No<br>1 Yes |  |
|  | Does your house have a television?    | 0 No<br>1 Yes |  |

|  |                                                                                                                                        |                                                                                                                                                                                           |  |
|--|----------------------------------------------------------------------------------------------------------------------------------------|-------------------------------------------------------------------------------------------------------------------------------------------------------------------------------------------|--|
|  | Does your household have a refrigerator?                                                                                               | 0 No<br>1 Yes                                                                                                                                                                             |  |
|  | Does your household have a mobile phone?                                                                                               | 0 No<br>1 Yes                                                                                                                                                                             |  |
|  | Does any member of your household own a watch?                                                                                         | 0 No<br>1 Yes                                                                                                                                                                             |  |
|  | Does any member of your household have a bank account?                                                                                 | 0 No<br>1 Yes                                                                                                                                                                             |  |
|  | What is the main material of the floor?                                                                                                | 1 Earth/sand/dung<br>2 Cement<br>3 Other                                                                                                                                                  |  |
|  | What is the main material of the exterior walls?                                                                                       | 1 Cane/palm/trunks/dirt<br>2 Cement<br>3 Other                                                                                                                                            |  |
|  | What is the main material of the roof?                                                                                                 | 1 Metallic sheets<br>2 Other                                                                                                                                                              |  |
|  | What type of fuel does your household mainly use for cooking?                                                                          | 1 Charcoal<br>2 Wood<br>3 Other                                                                                                                                                           |  |
|  | In the last month, approximately what was the total income for this household?                                                         | 1 Less than Le 150,000<br>2 150,000 – 299,999<br>3 300,000 – 449,999<br>4 450,000 – 599,999<br>5 600,000 – 749,999<br>6 750,000 – 999,999<br>7 1,000,000 – 2,000,000<br>8 Above 2,000,000 |  |
|  | How much in total has your household spent on the following items IN THE LAST MONTH?<br><br>[Autofill with 0, enter 98 for Don't know] | LD [Integer] response for all<br><br>A Food<br>B Energy (Paraffin, charcoal)<br>C Water<br>D Electricity<br>E Rent<br>F Health care<br>G Everything else                                  |  |

|  |                                                                                                                                                                                    |                                                                                                                                                   |  |
|--|------------------------------------------------------------------------------------------------------------------------------------------------------------------------------------|---------------------------------------------------------------------------------------------------------------------------------------------------|--|
|  | <p>[Calculate sum of expenditures above]</p> <p>In the last month, your household has spent a total of [TOTAL]. Is this right?</p> <p>[IF INCORRECT GO BACK TO 313 AND REVISE]</p> |                                                                                                                                                   |  |
|  | <p>Are you visiting the clinic because of acute or routine or TB/HIV visits</p>                                                                                                    | <p>1. Acutely sick</p> <p>2. Routine visits ( Family Planning, ANC and Post-natal care</p> <p>3. Chronic care services ( HIV and TB services)</p> |  |

HEALTH CARE UTILIZATION (ACUTE)

|  |                                                                     |                                                                                                                                                                                                                                                                                                                                   |                                                 |
|--|---------------------------------------------------------------------|-----------------------------------------------------------------------------------------------------------------------------------------------------------------------------------------------------------------------------------------------------------------------------------------------------------------------------------|-------------------------------------------------|
|  | <p>Are you here because you are acutely sick</p>                    | <p>Yes</p> <p>No</p>                                                                                                                                                                                                                                                                                                              | <p>If acutely sick, ask the below questions</p> |
|  | <p>Are you here suffering from any of the following conditions?</p> | <p>1 Diarrhea</p> <p>2 Fever</p> <p>3 Difficulty breathing/coughing</p> <p>4 Serious injury</p> <p>5 Pain</p> <p>6 Skin problem (ulcers/sores/rashes etc)</p> <p>7 Anxiety/depression/difficulty sleeping</p> <p>8 Nausea/dizziness/light-headed</p> <p>9 Appetite problems</p> <p>10 Fatigue</p> <p>96 Other (please specify</p> |                                                 |
|  | <p>If other, please specify</p>                                     |                                                                                                                                                                                                                                                                                                                                   |                                                 |
|  | <p>How much did the illness affect your day-to-day life?</p>        | <p>1 Extremely</p> <p>2 A lot</p> <p>3 Moderately</p> <p>4 Slightly</p> <p>5 Not at all</p>                                                                                                                                                                                                                                       |                                                 |
|  | <p>How concerned were you about the illness?</p>                    | <p>1 Extremely</p> <p>2 A lot</p> <p>3 Moderately</p>                                                                                                                                                                                                                                                                             |                                                 |

|  |                                                                                   |                                                                                                                                                                    |                               |
|--|-----------------------------------------------------------------------------------|--------------------------------------------------------------------------------------------------------------------------------------------------------------------|-------------------------------|
|  |                                                                                   | 4 Slightly<br>5 Not at all                                                                                                                                         |                               |
|  | What was the nature of the injury?                                                | 1 Road traffic accident<br>2 Fall or other blunt force<br>3 Poisoning<br>4 Burn<br>96 Other (please specify)                                                       |                               |
|  | Who managed you at this clinic during your visit today?                           | 1 Medical doctor<br>2 Nurse<br>3 Midwife<br>4 Clinical officer<br>5 Dentist<br>6 Traditional practitioner<br>96 Other                                              |                               |
|  | During this illness, Did you seek care somewhere before coming to this hospital ? | Yes<br>No                                                                                                                                                          | If yes, answer question below |
|  | Where did you seek care?                                                          | Sierra Leone<br>1 Hospital or clinic<br>2 Drug store<br>3 Drug peddler<br>4 Traditional doctor<br>5 CHW<br>6 Church yard<br>7 At home<br>96 Other (please specify) |                               |
|  | Please specify                                                                    |                                                                                                                                                                    |                               |
|  | If hospital, Please name the hospital/clinic                                      |                                                                                                                                                                    |                               |
|  | About how long did it take you to get there?                                      | [Integer] Hours<br>[Integer] Minutes<br>[Autofill 0]                                                                                                               |                               |
|  | How did you get hear?<br>[SELECT ALL THAT APPLY]                                  | 1 Private vehicle<br>2 Public transportation<br>3 Taxicab<br>4 Ambulance or emergency vehicle<br>5 Bicycle                                                         |                               |

|  |                                                                                                                                              |                                                                                                                                                                                                                                                                                                                                                                                                                                                  |  |
|--|----------------------------------------------------------------------------------------------------------------------------------------------|--------------------------------------------------------------------------------------------------------------------------------------------------------------------------------------------------------------------------------------------------------------------------------------------------------------------------------------------------------------------------------------------------------------------------------------------------|--|
|  |                                                                                                                                              | 6 Motorbike<br>7 Walked<br>96 Other                                                                                                                                                                                                                                                                                                                                                                                                              |  |
|  | During this visits, how long did it take to be managed by the health facility team? [Including waiting times for consultation and treatment] | [Integer] Days<br>[Integer] Hours<br>[Integer] Minutes<br>[Autofill 0]                                                                                                                                                                                                                                                                                                                                                                           |  |
|  | Why did you choose this health facility?                                                                                                     | 1 Nearness of the facility<br>2 Service providers are nice/friendly<br>3 Good services are available<br>4 Short waiting times<br>5 Qualified doctors are available<br>6 Low fees/low treatment cost<br>7 Good waiting arrangements<br>8 Confidentiality is maintained<br>9 Do not know where else to go<br>10 Medicine is also available<br>11 Availability of diagnostic service<br>12 Recommendation from someone<br>96 Other (please specify) |  |
|  | If others, please specify                                                                                                                    |                                                                                                                                                                                                                                                                                                                                                                                                                                                  |  |
|  | Were there any problems with the service during this visit? [SELECT ALL THAT APPLY]                                                          | 1 Waited too long<br>2 Inadequate explanations about the problem or treatment<br>3 Lack of privacy from having other see or hear the examination or visit<br>4 Lack of medicines<br>5 Opening hours are inconvenient<br>6 Opening days are inconvenient<br>7 Facility is not clean<br>8 Poor treatment from staff<br>9 High cost for services or treatments                                                                                      |  |
|  | How do you answer the following questions                                                                                                    |                                                                                                                                                                                                                                                                                                                                                                                                                                                  |  |
|  | Health facility staff are compassionate towards my children and myself                                                                       | 1 strongly disagree<br>2 disagree<br>3 Neither agree nor disagree                                                                                                                                                                                                                                                                                                                                                                                |  |

|  |                                                                                    |                                                                                                  |  |
|--|------------------------------------------------------------------------------------|--------------------------------------------------------------------------------------------------|--|
|  |                                                                                    | 4 agree<br>5 strongly agree                                                                      |  |
|  | Health facility staff are disrespectful towards my children and myself             | 1 strongly disagree<br>2 disagree<br>3 Neither agree nor disagree<br>4 agree<br>5 strongly agree |  |
|  | Health facility staff do not have much time to spend with the people they care for | 1 strongly disagree<br>2 disagree<br>3 Neither agree nor disagree<br>4 agree<br>5 strongly agree |  |
|  | I find it easy to talk to health facility staff                                    | 1 strongly disagree<br>2 disagree<br>3 Neither agree nor disagree<br>4 agree<br>5 strongly agree |  |
|  | Health facility staff are knowledgeable about my condition                         | 1 strongly disagree<br>2 disagree<br>3 Neither agree nor disagree<br>4 agree<br>5 strongly agree |  |
|  | Health facility staff are unkind to patients                                       | 1 strongly disagree<br>2 disagree<br>3 Neither agree nor disagree<br>4 agree<br>5 strongly agree |  |
|  | The health facility is always clean and well maintained                            | 1 strongly disagree<br>2 disagree<br>3 Neither agree nor disagree<br>4 agree<br>5 strongly agree |  |
|  | The health facility has proper medical equipment                                   | 1 strongly disagree<br>2 disagree<br>3 Neither agree nor disagree<br>4 agree<br>5 strongly agree |  |

|  |                                                                                          |                                                                                                                  |  |
|--|------------------------------------------------------------------------------------------|------------------------------------------------------------------------------------------------------------------|--|
|  | The health facility often runs out of medication and supplies                            | 1 strongly disagree<br>2 disagree<br>3 Neither agree nor disagree<br>4 agree<br>5 strongly agree                 |  |
|  | The health facility is well staffed                                                      | 1 strongly disagree<br>2 disagree<br>3 Neither agree nor disagree<br>4 agree<br>5 strongly agree                 |  |
|  | Waiting line this health facility is too long                                            | 1 strongly disagree<br>2 disagree<br>3 Neither agree nor disagree<br>4 agree<br>5 strongly agree                 |  |
|  | Overall, I am satisfied with the care provided to and my family by health facility staff | 1 Very satisfied<br>2 Satisfied<br>3 Neither satisfied nor dissatisfied<br>4 Dissatisfied<br>5 Very dissatisfied |  |
|  | Health care spending                                                                     |                                                                                                                  |  |
|  | Registration and consultation fees for this illness?                                     | 1. [Integer] Leones<br>2. Free<br>3. Don't know                                                                  |  |
|  | Diagnostic and laboratory tests, such as x-rays or blood tests?                          |                                                                                                                  |  |
|  | Medications or drugs                                                                     | 1. [Integer] Leones<br>2. Free<br>3. Don't know                                                                  |  |
|  | Any other health care products or services that were not included above? Please specify: | 1. [Integer] Leones<br>2. Free<br>3. Don't know                                                                  |  |
|  |                                                                                          |                                                                                                                  |  |



Tuberculosis/HIV services

|  |                                                                                                                                                                         |                                                                                                                                       |                               |
|--|-------------------------------------------------------------------------------------------------------------------------------------------------------------------------|---------------------------------------------------------------------------------------------------------------------------------------|-------------------------------|
|  | Are you here for routine HIV/tuberculosis services?                                                                                                                     | 0 No<br>1 Yes                                                                                                                         |                               |
|  | If yes, which services are you receiving here today?                                                                                                                    | 1 tuberculosis services<br>2 HIV services<br>3 Both                                                                                   |                               |
|  | How much did this illness (tuberculosis or HIV) affect your day-to-day life?                                                                                            | 1 Extremely<br>2 A lot<br>3 Moderately<br>4 Slightly<br>5 Not at all                                                                  |                               |
|  | How concerned are you about the illness?                                                                                                                                | 1 Extremely<br>2 A lot<br>3 Moderately<br>4 Slightly<br>5 Not at all                                                                  |                               |
|  | Who managed you at this clinic during your visit today?                                                                                                                 | 1 Medical doctor<br>2 Nurse<br>3 Midwife<br>4 Clinical officer<br>5 Dentist<br>6 Traditional practitioner<br>96 Other                 |                               |
|  | In the past 3 months ( or since the diagnosis of this disease if it was diagnosed less than 3 months ago), did you seek care somewhere before coming to this hospital ? | Yes<br>No                                                                                                                             | If yes, answer question below |
|  | Where did you seek care?                                                                                                                                                | Sierra Leone<br>1 Hospital or clinic<br>2 Drug store<br>3 Drug peddler<br>4 Traditional doctor<br>5 CHW<br>6 Church yard<br>7 At home |                               |

|  |                                                                                                                                                 |                                                                                                                                                                                                                                                                                                                                                                                                                                                  |  |
|--|-------------------------------------------------------------------------------------------------------------------------------------------------|--------------------------------------------------------------------------------------------------------------------------------------------------------------------------------------------------------------------------------------------------------------------------------------------------------------------------------------------------------------------------------------------------------------------------------------------------|--|
|  |                                                                                                                                                 | 96 Other (please specify)                                                                                                                                                                                                                                                                                                                                                                                                                        |  |
|  | Please specify                                                                                                                                  |                                                                                                                                                                                                                                                                                                                                                                                                                                                  |  |
|  | If hospital, Please name the hospital/clinic                                                                                                    |                                                                                                                                                                                                                                                                                                                                                                                                                                                  |  |
|  | About how long did it take you to get this clinic today?                                                                                        | [Integer] Hours<br>[Integer] Minutes<br>[Autofill 0]                                                                                                                                                                                                                                                                                                                                                                                             |  |
|  | How did you get here?<br>[SELECT ALL THAT APPLY]                                                                                                | 1 Private vehicle<br>2 Public transportation<br>3 Taxicab<br>4 Ambulance or emergency vehicle<br>5 Bicycle<br>6 Motorbike<br>7 Walked<br>96 Other                                                                                                                                                                                                                                                                                                |  |
|  | During this visits, how long did it take to be managed by the health facility team?<br>[Including waiting times for consultation and treatment] | [Integer] Days<br>[Integer] Hours<br>[Integer] Minutes<br>[Autofill 0]                                                                                                                                                                                                                                                                                                                                                                           |  |
|  | Why did you choose this health facility?                                                                                                        | 1 Nearness of the facility<br>2 Service providers are nice/friendly<br>3 Good services are available<br>4 Short waiting times<br>5 Qualified doctors are available<br>6 Low fees/low treatment cost<br>7 Good waiting arrangements<br>8 Confidentiality is maintained<br>9 Do not know where else to go<br>10 Medicine is also available<br>11 Availability of diagnostic service<br>12 Recommendation from someone<br>96 Other (please specify) |  |
|  | If others, please specify                                                                                                                       |                                                                                                                                                                                                                                                                                                                                                                                                                                                  |  |
|  | Were there any problems with the service during this visit? [SELECT ALL THAT APPLY]                                                             | 1 Waited too long<br>2 Inadequate explanations about the problem or treatment                                                                                                                                                                                                                                                                                                                                                                    |  |

|  |                                                                                    |                                                                                                                                                                                                                                                                            |  |
|--|------------------------------------------------------------------------------------|----------------------------------------------------------------------------------------------------------------------------------------------------------------------------------------------------------------------------------------------------------------------------|--|
|  |                                                                                    | 3 Lack of privacy from having other see or hear the examination or visit<br>4 Lack of medicines<br>5 Opening hours are inconvenient<br>6 Opening days are inconvenient<br>7 Facility is not clean<br>8 Poor treatment from staff<br>9 High cost for services or treatments |  |
|  | How do you answer the following questions                                          |                                                                                                                                                                                                                                                                            |  |
|  | Health facility staff are compassionate towards my children and myself             | 1 strongly disagree<br>2 disagree<br>3 Neither agree nor disagree<br>4 agree<br>5 strongly agree                                                                                                                                                                           |  |
|  | Health facility staff are disrespectful towards my children and myself             | 1 strongly disagree<br>2 disagree<br>3 Neither agree nor disagree<br>4 agree<br>5 strongly agree                                                                                                                                                                           |  |
|  | Health facility staff do not have much time to spend with the people they care for | 1 strongly disagree<br>2 disagree<br>3 Neither agree nor disagree<br>4 agree<br>5 strongly agree                                                                                                                                                                           |  |
|  | I find it easy to talk to health facility staff                                    | 1 strongly disagree<br>2 disagree<br>3 Neither agree nor disagree<br>4 agree<br>5 strongly agree                                                                                                                                                                           |  |
|  | Health facility staff are knowledgeable about my condition                         | 1 strongly disagree<br>2 disagree<br>3 Neither agree nor disagree<br>4 agree<br>5 strongly agree                                                                                                                                                                           |  |
|  | Health facility staff are unkind to patients                                       | 1 strongly disagree                                                                                                                                                                                                                                                        |  |

|  |                                                                                          |                                                                                                                  |  |
|--|------------------------------------------------------------------------------------------|------------------------------------------------------------------------------------------------------------------|--|
|  |                                                                                          | 2 disagree<br>3 Neither agree nor disagree<br>4 agree<br>5 strongly agree                                        |  |
|  | The health facility is always clean and well maintained                                  | 1 strongly disagree<br>2 disagree<br>3 Neither agree nor disagree<br>4 agree<br>5 strongly agree                 |  |
|  | The health facility has proper medical equipment                                         | 1 strongly disagree<br>2 disagree<br>3 Neither agree nor disagree<br>4 agree<br>5 strongly agree                 |  |
|  | The health facility often runs out of medication and supplies                            | 1 strongly disagree<br>2 disagree<br>3 Neither agree nor disagree<br>4 agree<br>5 strongly agree                 |  |
|  | The health facility is well staffed                                                      | 1 strongly disagree<br>2 disagree<br>3 Neither agree nor disagree<br>4 agree<br>5 strongly agree                 |  |
|  | Waiting line this health facility is too long                                            | 1 strongly disagree<br>2 disagree<br>3 Neither agree nor disagree<br>4 agree<br>5 strongly agree                 |  |
|  | Overall, I am satisfied with the care provided to and my family by health facility staff | 1 Very satisfied<br>2 Satisfied<br>3 Neither satisfied nor dissatisfied<br>4 Dissatisfied<br>5 Very dissatisfied |  |
|  | Health care spending                                                                     |                                                                                                                  |  |

|  |                                                                                          |                                                 |  |
|--|------------------------------------------------------------------------------------------|-------------------------------------------------|--|
|  | Registration and consultation fees for this visit?                                       | 1. [Integer] Leones<br>2. Free<br>3. Don't know |  |
|  | Diagnostic and laboratory tests, such as x-rays or blood tests?                          |                                                 |  |
|  | Medications or drugs                                                                     | 1. [Integer] Leones<br>2. Free<br>3. Don't know |  |
|  | Any other health care products or services that were not included above? Please specify: | 1. [Integer] Leones<br>2. Free<br>3. Don't know |  |
|  |                                                                                          |                                                 |  |

Reproductive, Maternal and child health services

|      |                                                               |                                                                                                                                       |  |
|------|---------------------------------------------------------------|---------------------------------------------------------------------------------------------------------------------------------------|--|
| 3201 | Please indicate which services the patient has received today | 1 Family planning<br>2 Antenatal Care<br>3 Postnatal care                                                                             |  |
|      | Who managed you at this clinic during your visit today?       | 1 Medical doctor<br>2 Nurse<br>3 Midwife<br>4 Clinical officer<br>5 Dentist<br>6 Traditional practitioner<br>96 Other                 |  |
|      | About how long did it take you to get there?                  | [Integer] Hours<br>[Integer] Minutes<br>[Autofill 0]                                                                                  |  |
|      | How did you get here?<br>[SELECT ALL THAT APPLY]              | 1 Private vehicle<br>2 Public transportation<br>3 Taxicab<br>4 Ambulance or emergency vehicle<br>5 Bicycle<br>6 Motorbike<br>7 Walked |  |

|  |                                                                                                                                                |                                                                                                                                                                                                                                                                                                                                                                                                                                                  |  |
|--|------------------------------------------------------------------------------------------------------------------------------------------------|--------------------------------------------------------------------------------------------------------------------------------------------------------------------------------------------------------------------------------------------------------------------------------------------------------------------------------------------------------------------------------------------------------------------------------------------------|--|
|  |                                                                                                                                                | 96 Other                                                                                                                                                                                                                                                                                                                                                                                                                                         |  |
|  | During this visit, how long did it take to be managed by the health facility team?<br>[Including waiting times for consultation and treatment] | [Integer] Days<br>[Integer] Hours<br>[Integer] Minutes<br>[Autofill 0]                                                                                                                                                                                                                                                                                                                                                                           |  |
|  | Why did you choose this health facility?                                                                                                       | 1 Nearness of the facility<br>2 Service providers are nice/friendly<br>3 Good services are available<br>4 Short waiting times<br>5 Qualified doctors are available<br>6 Low fees/low treatment cost<br>7 Good waiting arrangements<br>8 Confidentiality is maintained<br>9 Do not know where else to go<br>10 Medicine is also available<br>11 Availability of diagnostic service<br>12 Recommendation from someone<br>96 Other (please specify) |  |
|  | If others, please specify                                                                                                                      |                                                                                                                                                                                                                                                                                                                                                                                                                                                  |  |
|  | Were there any problems with the service during this visit? [SELECT ALL THAT APPLY]                                                            | 1 Waited too long<br>2 Inadequate explanations about the problem or treatment<br>3 Lack of privacy from having other see or hear the examination or visit<br>4 Lack of medicines<br>5 Opening hours are inconvenient<br>6 Opening days are inconvenient<br>7 Facility is not clean<br>8 Poor treatment from staff<br>9 High cost for services or treatments                                                                                      |  |
|  | How do you answer the following questions                                                                                                      |                                                                                                                                                                                                                                                                                                                                                                                                                                                  |  |
|  | Health facility staff are compassionate towards my children and myself                                                                         | 1 strongly disagree<br>2 disagree<br>3 Neither agree nor disagree<br>4 agree<br>5 strongly agree                                                                                                                                                                                                                                                                                                                                                 |  |

|  |                                                                                    |                                                                                                  |  |
|--|------------------------------------------------------------------------------------|--------------------------------------------------------------------------------------------------|--|
|  | Health facility staff are disrespectful towards my children and myself             | 1 strongly disagree<br>2 disagree<br>3 Neither agree nor disagree<br>4 agree<br>5 strongly agree |  |
|  | Health facility staff do not have much time to spend with the people they care for | 1 strongly disagree<br>2 disagree<br>3 Neither agree nor disagree<br>4 agree<br>5 strongly agree |  |
|  | I find it easy to talk to health facility staff                                    | 1 strongly disagree<br>2 disagree<br>3 Neither agree nor disagree<br>4 agree<br>5 strongly agree |  |
|  | Health facility staff are knowledgeable about my condition                         | 1 strongly disagree<br>2 disagree<br>3 Neither agree nor disagree<br>4 agree<br>5 strongly agree |  |
|  | Health facility staff are unkind to patients                                       | 1 strongly disagree<br>2 disagree<br>3 Neither agree nor disagree<br>4 agree<br>5 strongly agree |  |
|  | The health facility is always clean and well maintained                            | 1 strongly disagree<br>2 disagree<br>3 Neither agree nor disagree<br>4 agree<br>5 strongly agree |  |
|  | The health facility has proper medical equipment                                   | 1 strongly disagree<br>2 disagree<br>3 Neither agree nor disagree<br>4 agree<br>5 strongly agree |  |

|  |                                                                                          |                                                                                                                  |  |
|--|------------------------------------------------------------------------------------------|------------------------------------------------------------------------------------------------------------------|--|
|  | The health facility often runs out of medication and supplies                            | 1 strongly disagree<br>2 disagree<br>3 Neither agree nor disagree<br>4 agree<br>5 strongly agree                 |  |
|  | The health facility is well staffed                                                      | 1 strongly disagree<br>2 disagree<br>3 Neither agree nor disagree<br>4 agree<br>5 strongly agree                 |  |
|  | Waiting line this health facility is too long                                            | 1 strongly disagree<br>2 disagree<br>3 Neither agree nor disagree<br>4 agree<br>5 strongly agree                 |  |
|  | Overall, I am satisfied with the care provided to and my family by health facility staff | 1 Very satisfied<br>2 Satisfied<br>3 Neither satisfied nor dissatisfied<br>4 Dissatisfied<br>5 Very dissatisfied |  |
|  | Health care spending                                                                     |                                                                                                                  |  |
|  | Registration and consultation fees for this illness?                                     | 1. [Integer] Leones<br>2. Free<br>3. Don't know                                                                  |  |
|  | Diagnostic and laboratory tests, such as x-rays or blood tests?                          |                                                                                                                  |  |
|  | Medications or drugs                                                                     | 1. [Integer] Leones<br>2. Free<br>3. Don't know                                                                  |  |
|  | Any other health care products or services that were not included above? Please specify: | 1. [Integer] Leones<br>2. Free<br>3. Don't know                                                                  |  |
|  |                                                                                          |                                                                                                                  |  |
